# Supplementary material for: A Possible Percutaneous Penetration Pathway That Should Be Considered
Source: MDPI journal article supplement (doi:10.3390/pharmaceutics9030026), 2017-07-27
Supplement: s1 [file s1]

# Supplementary Materials: A Possible Percutaneous Penetration Pathway Which Should Be Considered

Ichiro Hatta, Noboru Ohta and Hiromitsu Nakazawa

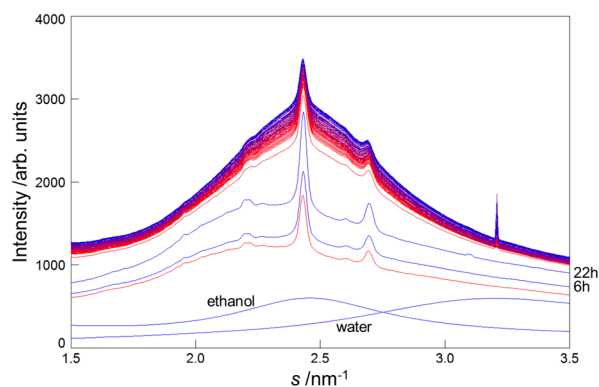

**Figure S1.** Time-resolved profiles of wide-angle X-ray diffraction obtained from human stratum corneum (sample #E2) when ethanol was applied to the stratum corneum with a water content of about 25 wt %. The profiles changed from the red to the blue curve over time. The blue profiles at 6 h and 22 h show those obtained by removing ethanol from the treated stratum corneum, as mentioned in the text. Profiles of ethanol and water are shown for convenience in a relative scale.

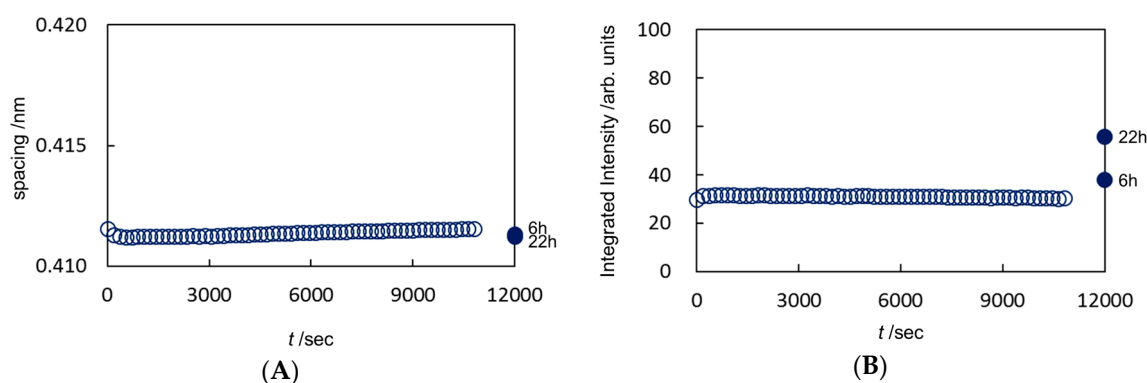

**Figure S2.** Analyzed results in the stratum corneum treated with ethanol for sample #E2. (A) Change of the spacing of the hydrocarbon-chain packing structure at the lattice constant 0.41 nm; (B) the change in its integrated intensity.

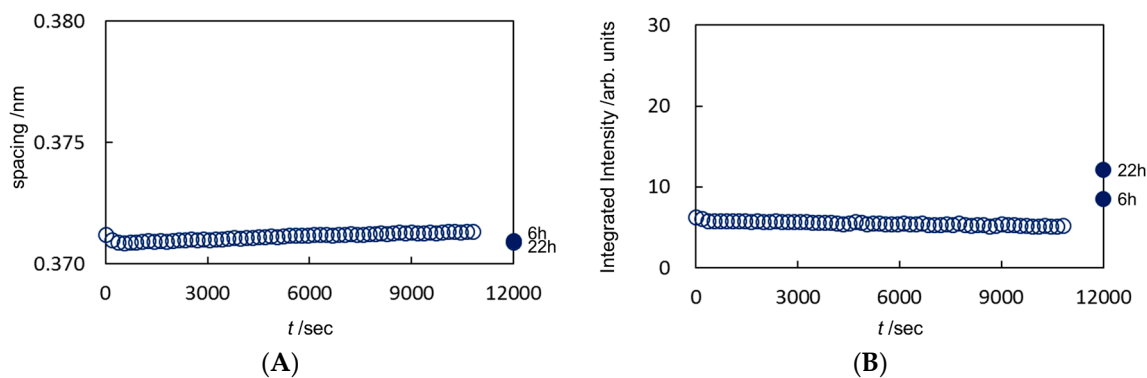

**Figure S3.** Analyzed results in the stratum corneum treated with ethanol for sample #E2. (A) Change of the spacing of the hydrocarbon-chain packing structure at the lattice constant 0.37 nm; (B) change of its integrated intensity.
